# Supplementary material for: Surface active benzodiazepine-bromo-alkyl conjugate for potential GABAA-receptor purification
Source: Royal Society of Chemistry journal article supplement (doi:10.1039/c1ob05210a), 2011-01-01

## SUPPORTING INFORMATION

Manuscript title: **Surface active benzodiazepine-bromo-acyl conjugate for potential GABA<sub>A</sub>-receptor purification.**

Authors: *Turina A.V.<sup>§</sup>, Quinteros, G.<sup>†</sup>, Caruso B.<sup>§</sup>, Moyano E.L.<sup>†</sup> and Perillo M. A.<sup>§\*</sup>*

**Contents** (S1 to S 13 are the page numbers)

S 1 - Title, authors and description of Supporting information content

S 2 -Variation of the Compresional modulus (K) with the Mma of the dpPC-BDC binary mixtures.

S 3 - Characterization of BDC. <sup>1</sup>H-NMR Spectra.

S 4 - Characterization of BDC. <sup>13</sup>C-NMR Spectra.

S 5 - Characterization of BDC. NMR-HSQC Spectra (200 MHz, CDCl<sub>3</sub>).

### Variation of the Compressional modulus (K) with the Mma of the dpPC-BDC binary mixtures.

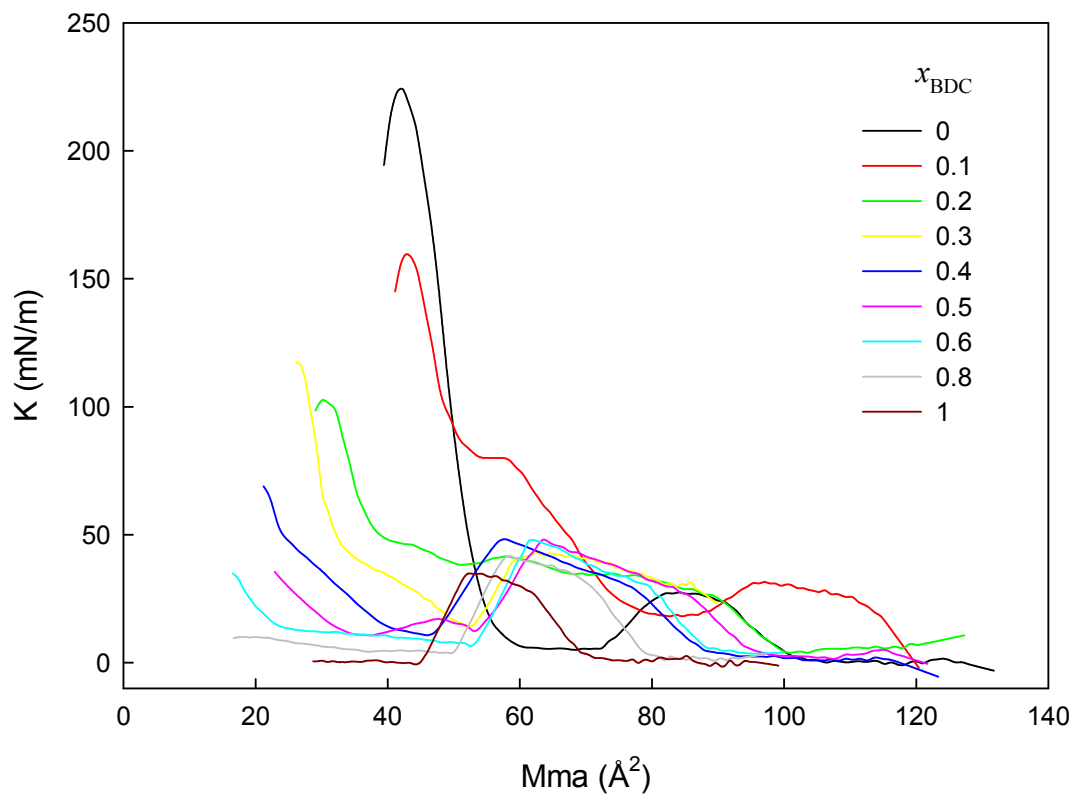

### Characterization of BDC. <sup>1</sup>H-NMR Spectra

<sup>1</sup>H NMR (400 MHz, CDCl<sub>3</sub>), δ (ppm): 1.43 (m, 18H); 1.85 (q, *J*= 6.96 Hz, 2H); 3.41 (t, *J*= 6.88 Hz, 2H); 3.78 (m, 1H), 4.36 (m, 1H); 4.95 (d, *J*= 11 Hz, 1H); 3.81 (d, *J*= 11 Hz, 1H); 7.30 (m, 1H); 7.46 (m, 2H); 7.57 (d, *J*= 9 Hz, 1H); 7.66 (m, 1H); 7.94 (d, *J*= 3 Hz, 1H); 8.36 (dd, *J*= 3 Hz and *J*= 9 Hz, 1H).

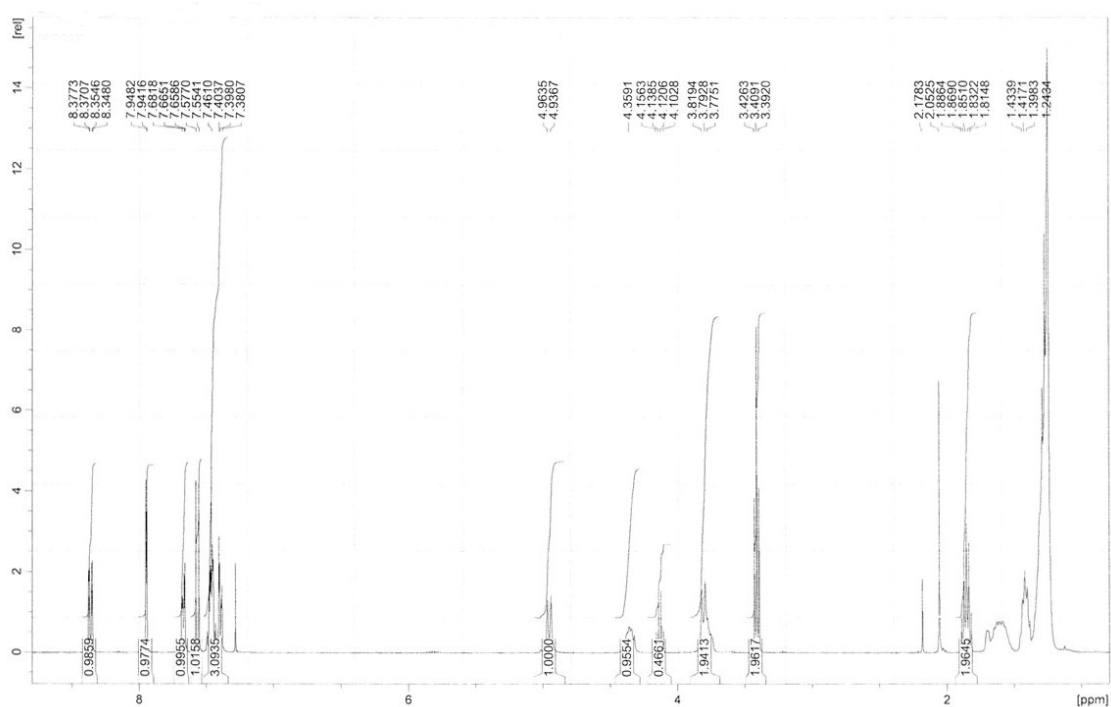

### Characterization of BDC. $^{13}\text{C}$ -NMR Spectra .

$^{13}\text{C}$ -NMR (200 MHz,  $\text{CDCl}_3$ ),  $\delta$  (ppm): 26.91; 28.15; 28.44; 28.72; 29.16; 29.35; 29.41;  
33.78; 47.49; 57.17; 122.57; 124.65; 126.00; 127.44; 130.38; 131.75; 132.97; 137.11;  
139.20; 143.26; 147.10; 167.98; 168.52.

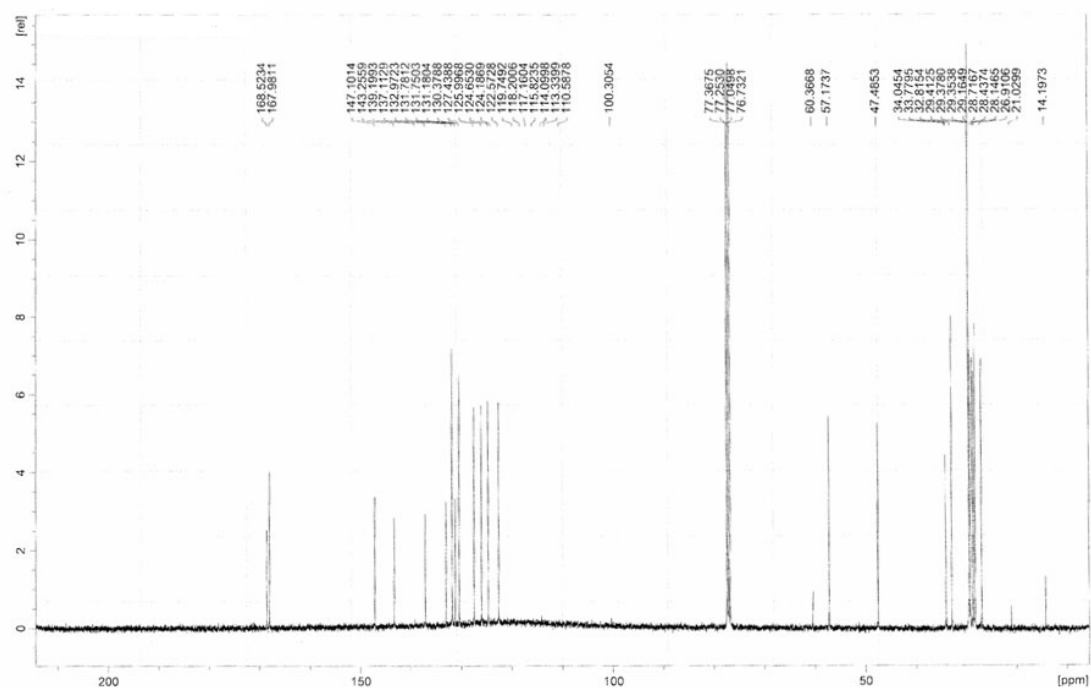

### Characterization of BDC. NMR-HSQC Spectra (200 MHz, CDCl<sub>3</sub>).

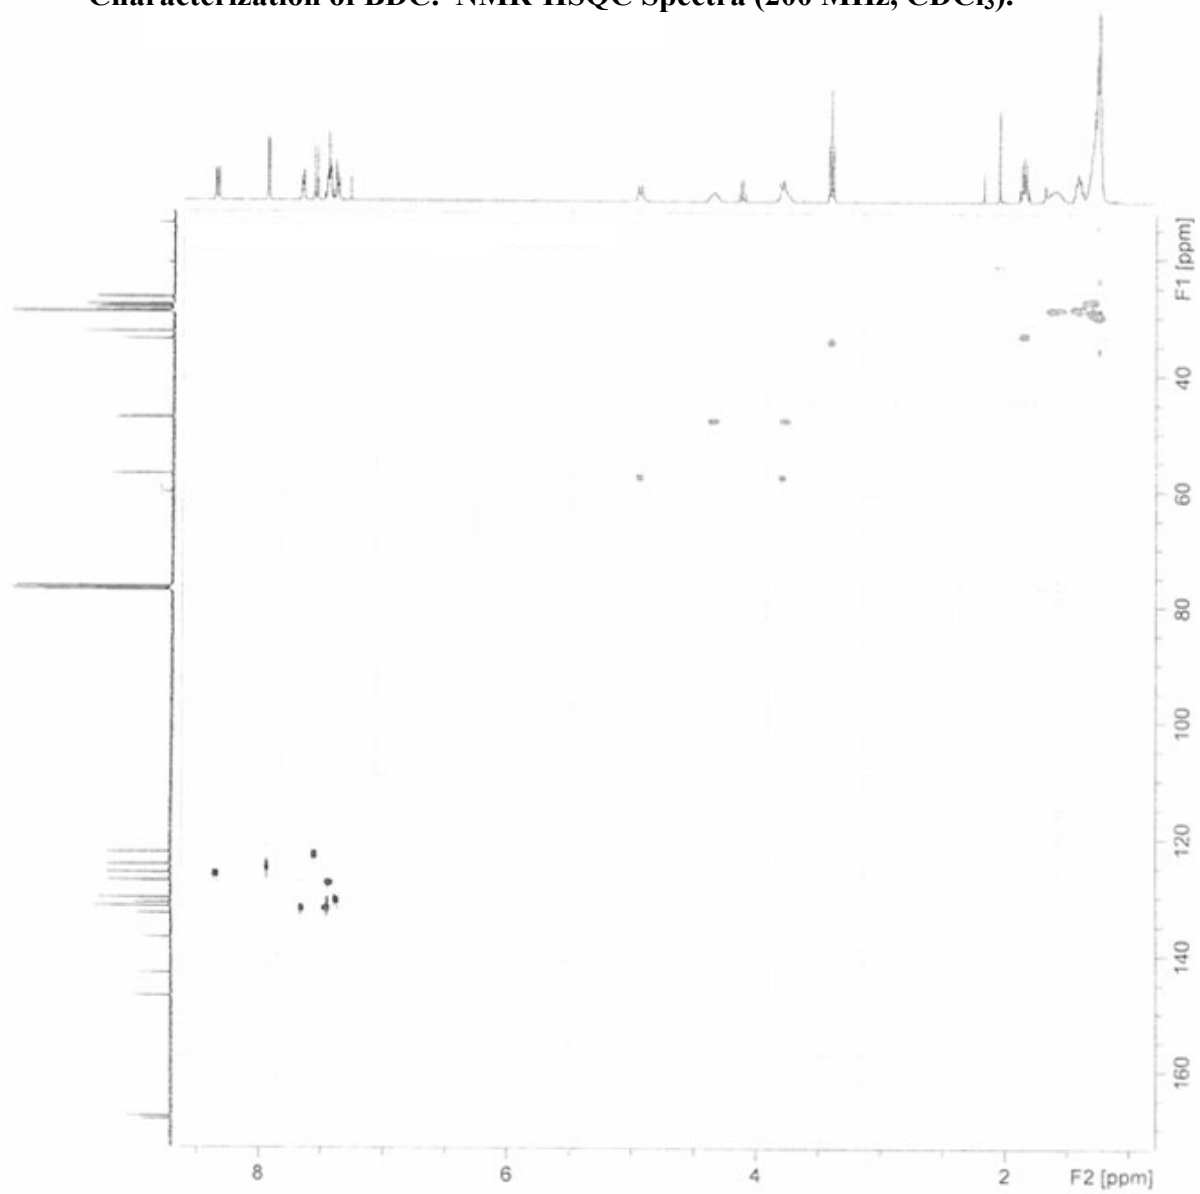

Supplement: c1ob05210a.pdf [file c1ob05210a.pdf]
